# Supplementary material for: Environmental chemistry response of beryllium to diverse soil-solution conditions at a waste disposal site
Source: Royal Society of Chemistry journal article supplement (doi:10.1039/d2em00313a), 2022-11-29
Supplement: d2em00313a1.pdf [file d2em00313a1.pdf]

1 **Supporting Information**

2  
3 **Environmental chemistry response of beryllium to diverse soil-solution**  
4 **conditions at a waste disposal site**

5  
6 Md. Rashidul Islam<sup>a,b\*</sup>; Peter Sanderson<sup>a,b</sup>; Mathew P. Johansen<sup>c</sup>; Timothy E. Payne<sup>c</sup>;  
7 Ravi Naidu<sup>a,b\*\*</sup>

8  
9 <sup>a</sup>Global Centre for Environmental Remediation (GCER), College of Engineering,  
10 Science and Environment; The University of Newcastle, University Drive, Callaghan  
11 Campus, NSW 2308, Australia.

12 <sup>b</sup>CRC for Contamination Assessment and Remediation of the Environment (CARE), The  
13 University of Newcastle, University Drive, Callaghan Campus, NSW 2308, Australia.

14 <sup>c</sup>Australian Nuclear Science and Technology Organisation (ANSTO), Lucas Heights,  
15 NSW 2234, Australia.

16  
17 Corresponding authors (\* and \*\*): Global Centre for Environmental Remediation, and  
18 CRC for Contamination Assessment and Remediation of the Environment (CARE), The  
19 University of Newcastle, University Drive, Callaghan Campus, NSW 2308, Australia

20 Contacts: ravi.naidu@newcastle.edu.au (+61 2 4913 8705) and  
21 md.rashidul.islam@uon.edu.au (+61470219676)

## 26 **Method**

27

### 28 **Study site**

29       The study site referred to as Little Forest Legacy Site (LFLS) is located near Lucas  
30 Heights on the southern periphery of Sydney. The site for the disposals was selected in a small  
31 area of a clay/shale lens (only a few hundred metres across), whereas the surrounding area and  
32 the formation underlying the site are predominantly sandstone <sup>1,2</sup>. There are 79 waste trenches  
33 covered by 1 m of the local clay soil at the centre of the site. The waste trenches are nominally  
34 25 m long, 0.6 m wide, 3 m deep, and 2.7 m apart. Adjacent to the western edge of the LFLS  
35 is a former landfill, and there are other nearby legacy waste disposal sites for industrial  
36 chemicals and sewage effluent, which could influence background levels of Be and other  
37 contaminants. An industrial liquid waste disposal site is to the north-west of the LFLS. It was  
38 used to dispose of grease, paints, solvents, and tannery wastes, as well as other specific  
39 hazardous industrial chemicals such as dioxin-contaminated material and residues from  
40 herbicide production <sup>3</sup>. There may be a mixing of contaminant plumes from the various waste  
41 disposal sites, including the LFLS <sup>2,4</sup>.

42       The disposed waste materials at LFLS existed in the form of a range of solids, liquids,  
43 and sludges, which originated from the operation of the research facility and included waste  
44 drums, chemicals, disused equipment, laboratory trash, and radioactive waste (including  
45 various radionuclides ranging from tritium, fission products and Co-60, to actinides such as U-  
46 233 and Pu). Of particular relevance to the current study is the disposal of approximately ~1070  
47 kg of Be wastes, which arose from research into the fabrication of nuclear fuel containing Be  
48 <sup>5</sup>. However, at the time of disposal in the 1960s, it was recognised that potential Be releases  
49 posed one of the greatest risks to the local environment due to its high toxicity <sup>1</sup>. Nearly 800  
50 drums of sludge wastes (each 44 gallon /198 litre) arising from research activities were also  
51 disposed of at the site, comprising a major component of the buried wastes, and also comprising

52 a potential source of Be. It was reported by the AAEC that some of the drums were badly  
53 deteriorated prior to disposal, and were difficult to remove from the area in that condition <sup>6</sup>. In  
54 the period since burials concluded, subsidence above the trenches has been reported, due to  
55 voids developing in the waste caused by further deterioration of disposed containers and objects  
56 <sup>3</sup>. The subsidence has been managed by adding additional soil- sourced from the local area- to  
57 the ground surface.

58 Intense rainfall events at the site result in periodic infiltration and wetting that can  
59 saturate the waste trenches (bathtub effect), which influences the mobility of contaminants <sup>4</sup>.  
60 Surface water runoff from the LFLS site could affect a local creek known as ‘Turtle Creek’,  
61 which is hydrologically down gradient, and subsequently impact other nearby creeks and rivers  
62 such as Barden’s Creek and Mill Creek. As well, the Barden Ridge suburb is 2.5 km to the east,  
63 while the suburb of Menai Ridge is 3 km to the north of the study area, and potential Be releases  
64 may pose one of the greatest risks to the local environment due to its high toxicity.

65

#### 66 **Physicochemical properties of LFLS soil**

67 The basic physicochemical properties of LFLS soil (0-10 cm depth, <2 mm) include the  
68 following: pH, electrical conductivity (EC), cation exchange capacity (CEC, by compulsive  
69 exchange method), soil texture (hydrometer method), soil total carbon [STC, by carbon-  
70 nitrogen-sulphur (CNS) analyser], soil organic matter (SOM), Brunauer-Emmett-Teller (BET)  
71 surface area (nitrogen gas adsorption-desorption using Micromeritics Tristar II 3020) <sup>7, 8</sup> were  
72 measured following standard methodology. Water holding capacity (WHC) was determined  
73 using soaking of soil with Milli-Q water followed by the gravimetric water content method <sup>9</sup>.  
74 XRD (Bruker D8 advanced X-ray powder diffractometer) for mineralogical study; Scanning  
75 Electron Microscope (SEM, Zeiss Sigma VP FESEM, Germany) and Transition Electron  
76 Microscope (TEM, JEOL LaB6 2100, Japan) were used for surface morphology.

77

78 **Results and discussion**

79

80 **Table S1** The average value of different physicochemical properties of LFLS soil <sup>7</sup>.

| Parameter                  | Average value $\pm$ SD |
|----------------------------|------------------------|
| pH-water (1:5)             | 6.06 $\pm$ 0.13        |
| pH-CaCl <sub>2</sub> (1:5) | 4.60 $\pm$ 0.17        |
| CEC (cmol/kg)              | 5.41 $\pm$ 0.40        |
| % Sand                     | 55.7 $\pm$ 2.3         |
| % Clay                     | 12.7 $\pm$ 1.2         |
| % Silt                     | 31.8 $\pm$ 2.3         |
| % Nitrogen (N)             | 0.21 $\pm$ 0.06        |
| % Sulphur (S)              | 0.02 $\pm$ 0.005       |
| % STC                      | 4.27 $\pm$ 0.70        |
| % SOC                      | 3.70 $\pm$ 0.44        |
| % SOM                      | 6.37 $\pm$ 0.75        |
| WHC (%)                    | 56                     |
| pH <sub>zpc</sub>          | 5.24                   |
| IEP                        | 2.10                   |

81

82

83 **Table S2** Langmuir and Freundlich desorption isotherm parameters of Be at different  
84 temperatures and desorption cycles.

| Temperatures | Langmuir model         |                         |                |                | Freundlich model       |                 |                |                |
|--------------|------------------------|-------------------------|----------------|----------------|------------------------|-----------------|----------------|----------------|
|              | K <sub>Ld</sub> (L/mg) | q <sub>mLd</sub> (mg/g) | X <sup>2</sup> | R <sup>2</sup> | K <sub>Fd</sub> (mg/L) | n <sub>d</sub>  | X <sup>2</sup> | R <sup>2</sup> |
| 318K C1      | 4.18 $\pm$ 0.34        | 0.953 $\pm$ 0.05        | 2.6E-05        | 0.9992         | 1.45 $\pm$ 0.12        | 1.36 $\pm$ 0.08 | 2.1E-04        | 0.9936         |
| 318K C2      | 5.81 $\pm$ 0.73        | 0.890 $\pm$ 0.07        | 7.3E-05        | 0.9978         | 1.59 $\pm$ 0.17        | 1.41 $\pm$ 0.10 | 3.0E-04        | 0.9910         |
| 318K C3      | 6.57 $\pm$ 0.72        | 0.893 $\pm$ 0.06        | 5.4E-05        | 0.9984         | 1.74 $\pm$ 0.17        | 1.41 $\pm$ 0.08 | 2.1E-04        | 0.9938         |
| 318K C4      | 6.83 $\pm$ 0.70        | 0.866 $\pm$ 0.05        | 5.1E-05        | 0.9985         | 1.71 $\pm$ 0.20        | 1.42 $\pm$ 0.10 | 3.5E-04        | 0.9898         |
| 308K C1      | 5.38 $\pm$ 0.57        | 0.809 $\pm$ 0.05        | 6.3E-05        | 0.9981         | 1.26 $\pm$ 0.14        | 1.47 $\pm$ 0.12 | 4.3E-04        | 0.9869         |
| 308K C2      | 7.23 $\pm$ 0.39        | 0.778 $\pm$ 0.02        | 1.6E-05        | 0.9995         | 1.41 $\pm$ 0.14        | 1.51 $\pm$ 0.10 | 3.1E-04        | 0.9908         |
| 308K C3      | 8.61 $\pm$ 0.47        | 0.772 $\pm$ 0.02        | 1.7E-05        | 0.9995         | 1.59 $\pm$ 0.17        | 1.49 $\pm$ 0.10 | 3.1E-04        | 0.9906         |
| 308K C4      | 7.81 $\pm$ 0.38        | 0.786 $\pm$ 0.02        | 1.3E-05        | 0.9996         | 1.53 $\pm$ 0.16        | 1.49 $\pm$ 0.10 | 2.9E-04        | 0.9912         |
| 298K C1      | 4.89 $\pm$ 0.51        | 0.851 $\pm$ 0.05        | 4.2E-05        | 0.9987         | 1.32 $\pm$ 0.05        | 1.43 $\pm$ 0.04 | 4.5E-05        | 0.9986         |
| 298K C2      | 6.57 $\pm$ 0.88        | 0.795 $\pm$ 0.06        | 7.8E-05        | 0.9976         | 1.41 $\pm$ 0.08        | 1.48 $\pm$ 0.05 | 7.8E-05        | 0.9976         |
| 298K C3      | 7.58 $\pm$ 0.93        | 0.775 $\pm$ 0.05        | 6.8E-05        | 0.9979         | 1.48 $\pm$ 0.08        | 1.50 $\pm$ 0.05 | 6.5E-05        | 0.9980         |
| 298K C4      | 8.10 $\pm$ 1.05        | 0.730 $\pm$ 0.05        | 8.3E-05        | 0.9974         | 1.38 $\pm$ 0.07        | 1.54 $\pm$ 0.06 | 7.7E-05        | 0.9976         |
| 288K C1      | 1.57 $\pm$ 0.52        | 1.611 $\pm$ 0.42        | 1.1E-04        | 0.9966         | 1.46 $\pm$ 0.05        | 1.21 $\pm$ 0.03 | 2.7E-05        | 0.9991         |
| 288K C2      | 2.22 $\pm$ 0.85        | 1.370 $\pm$ 0.39        | 1.8E-04        | 0.9941         | 1.55 $\pm$ 0.10        | 1.24 $\pm$ 0.05 | 7.4E-05        | 0.9976         |
| 288K C3      | 2.90 $\pm$ 0.89        | 1.237 $\pm$ 0.27        | 1.5E-04        | 0.9952         | 1.66 $\pm$ 0.09        | 1.27 $\pm$ 0.04 | 5.1E-05        | 0.9984         |
| 288K C4      | 7.61 $\pm$ 1.00        | 0.693 $\pm$ 0.05        | 9.1E-05        | 0.9971         | 1.19 $\pm$ 0.06        | 1.58 $\pm$ 0.06 | 8.9E-05        | 0.9972         |

85 Note: K<sub>Ld</sub>, and q<sub>mLd</sub> are the Langmuir constant, and sorption maximum taking into account the desorption of Be  
86 in each desorption cycle; K<sub>Fd</sub>, and n<sub>d</sub> are the Freundlich constants, and sorption intensity where each desorption  
87 cycle is considered; X<sup>2</sup>= chi-square; R<sup>2</sup>= linear regression coefficient.

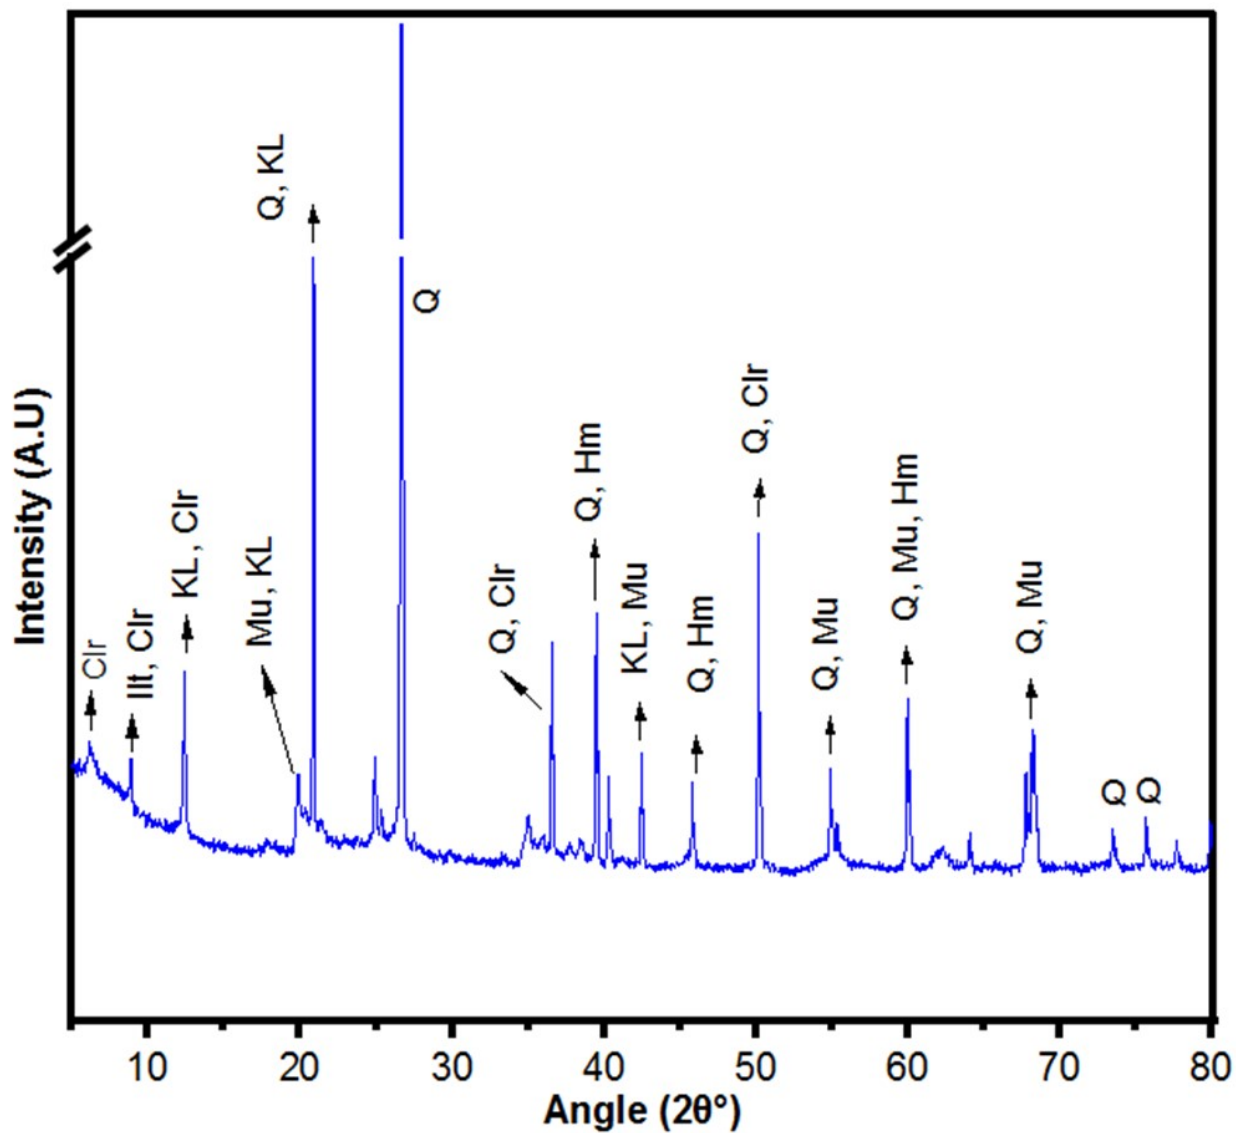

88

89 **Fig. S1** XRD (Cu K $\alpha$  radiation at 45kV, 40 mA) study for mineralogical investigation of the  
 90 LFLS soil (Clr=Chlorite; Ill=Illite; KL= Kaolinite; Mu= Muscovite; Q= Quartz; Hm=  
 91 Haematite).

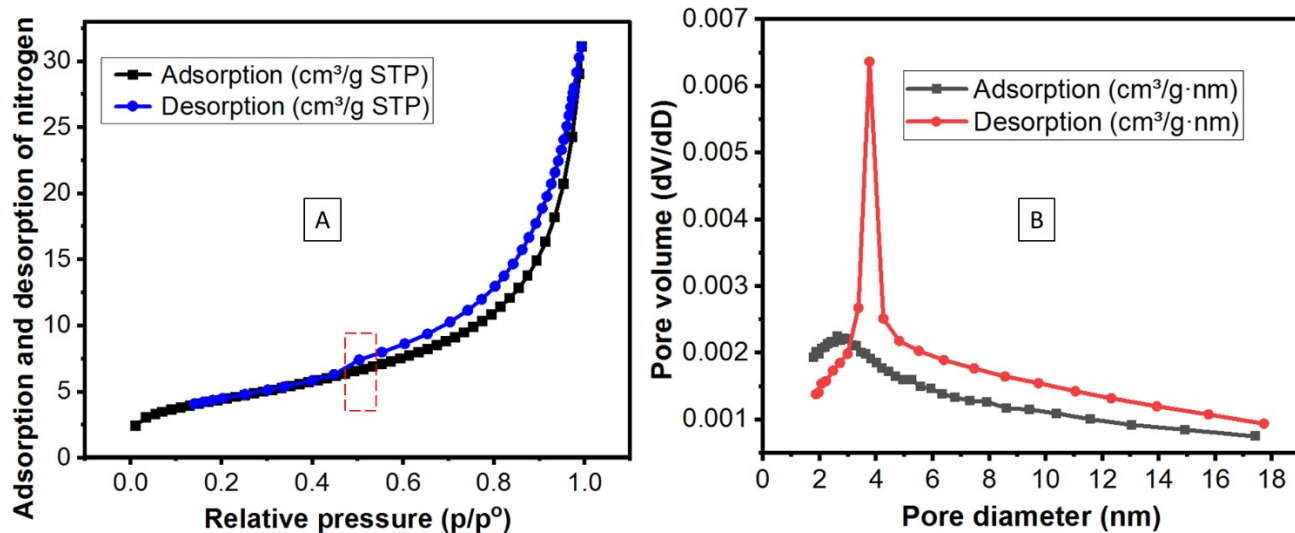

92

93 **Fig. S2** Brunauer-Emmett-Teller (BET) surface area of LFLS soil. (A) Adsorption-desorption  
 94 loop at  $p/p^0 > 0.4$  represents the porous (plate slit, narrow crack, and wedge pores) structure of  
 95 the soil; (B) The presence of both micro ( $\leq 2$  nm) and mesopores (2-50 nm) were also confirmed  
 96 by the 1.79-17.4 nm pore diameter. Adsorption-desorption isotherm of nitrogen gas indicates  
 97 single layer adsorption at low pressure (mesopore filling), and then multilayer adsorption and  
 98 capillary condensation at high pressure (micropore filling) <sup>10, 11</sup>.

99

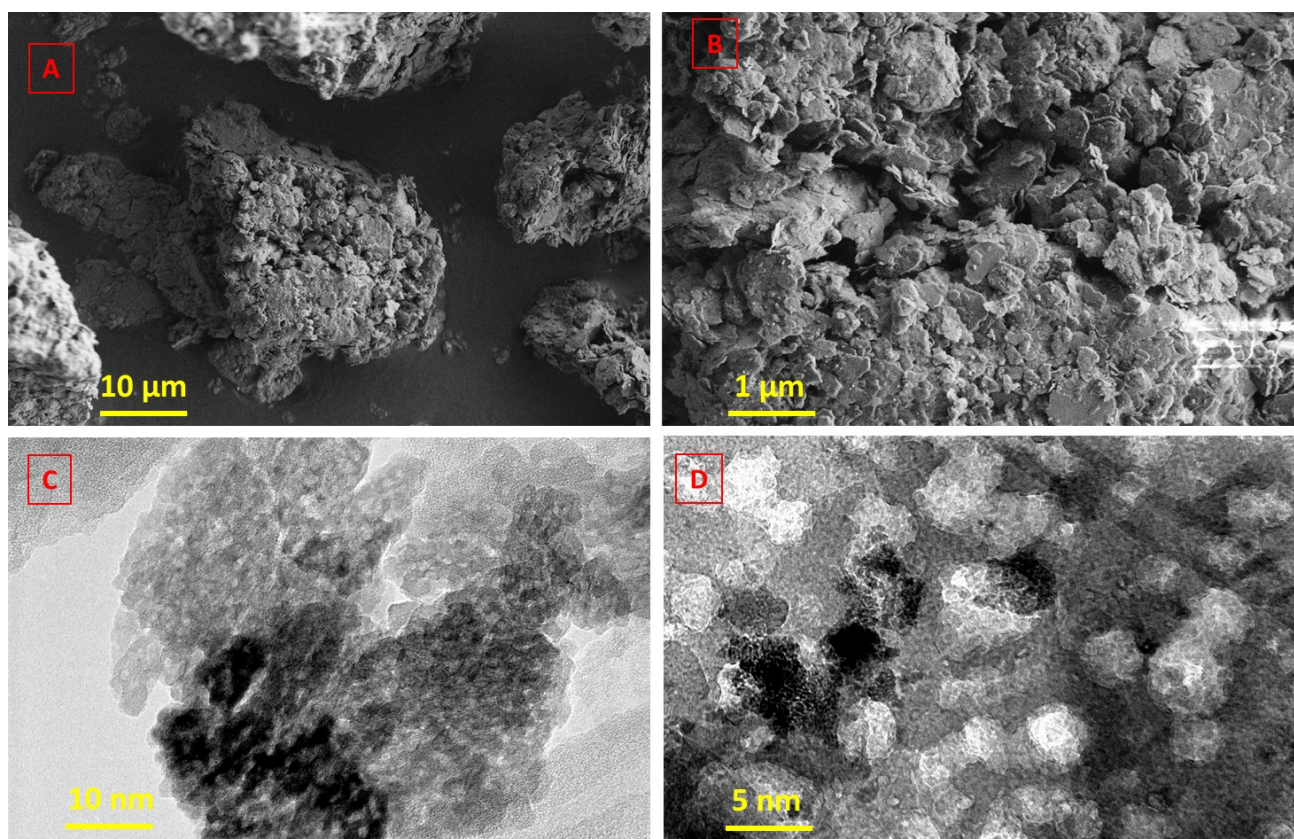

100



101 **Fig. S3** Surface morphology of the studied soil. (A, B) Scanning Electron Microscope (SEM)  
 102 represents agglomerated particles resulting in the porosity on the soil surface; (C, D) Transition  
 103 Electron Microscope (TEM) indicates both meso and micro pore present in the soil structure.

104

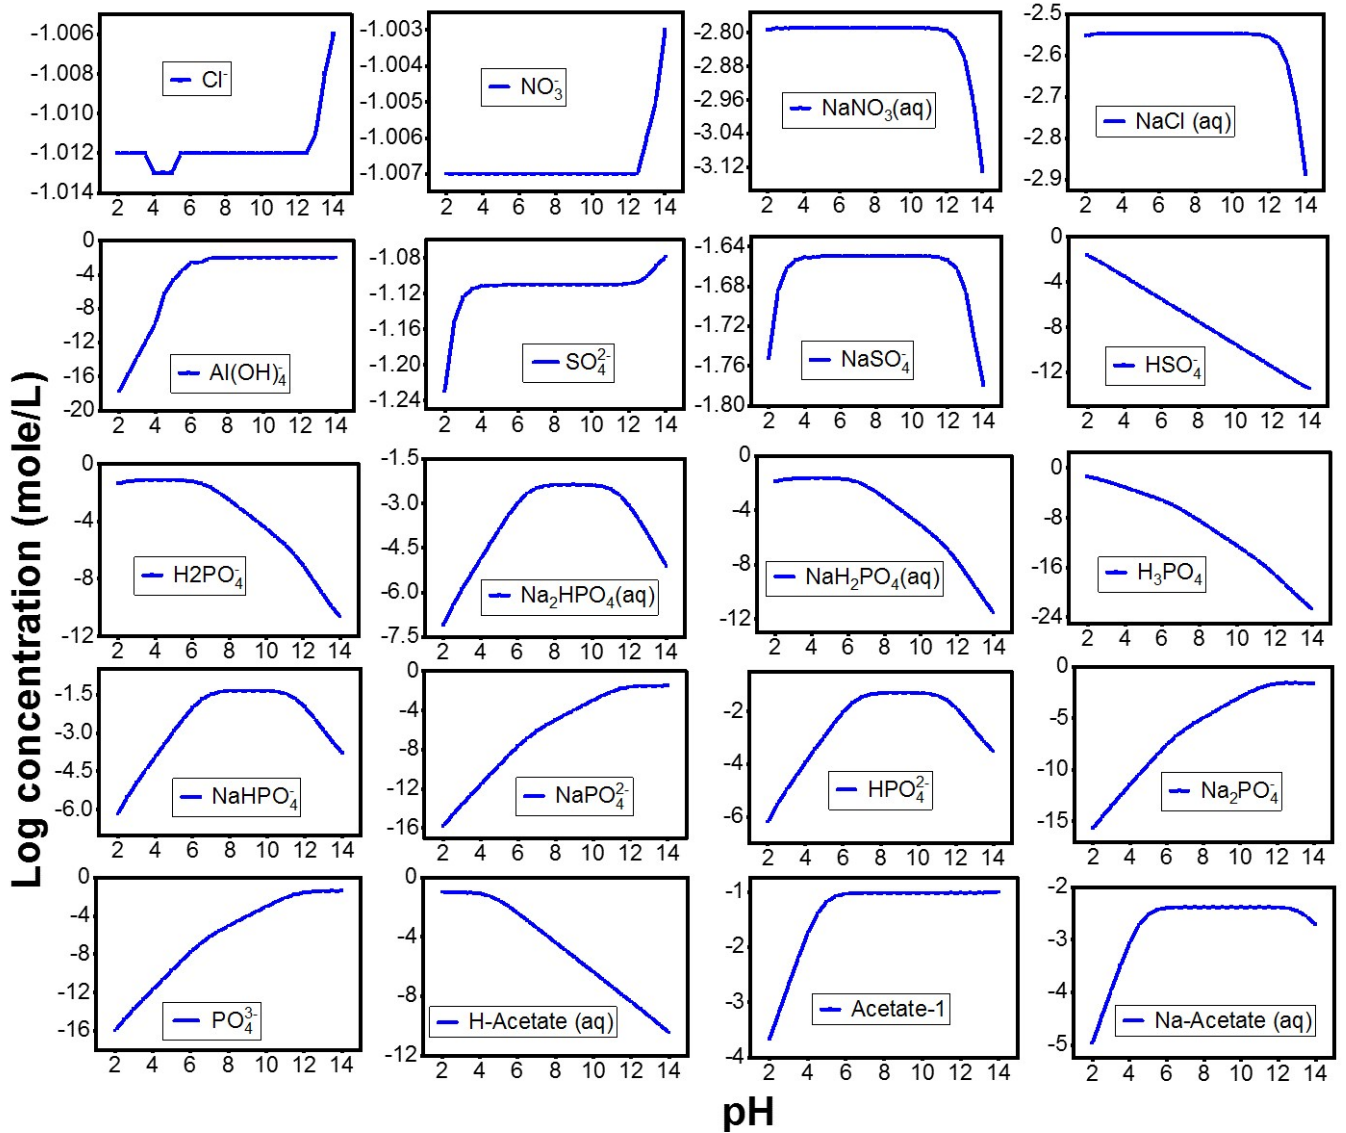

105

106 **Fig. S4** Different anions and species in aqueous solution (obtained using visual MITEQ  
 107 simulation) reflect their solubility and potential interaction with Be under different pH levels.

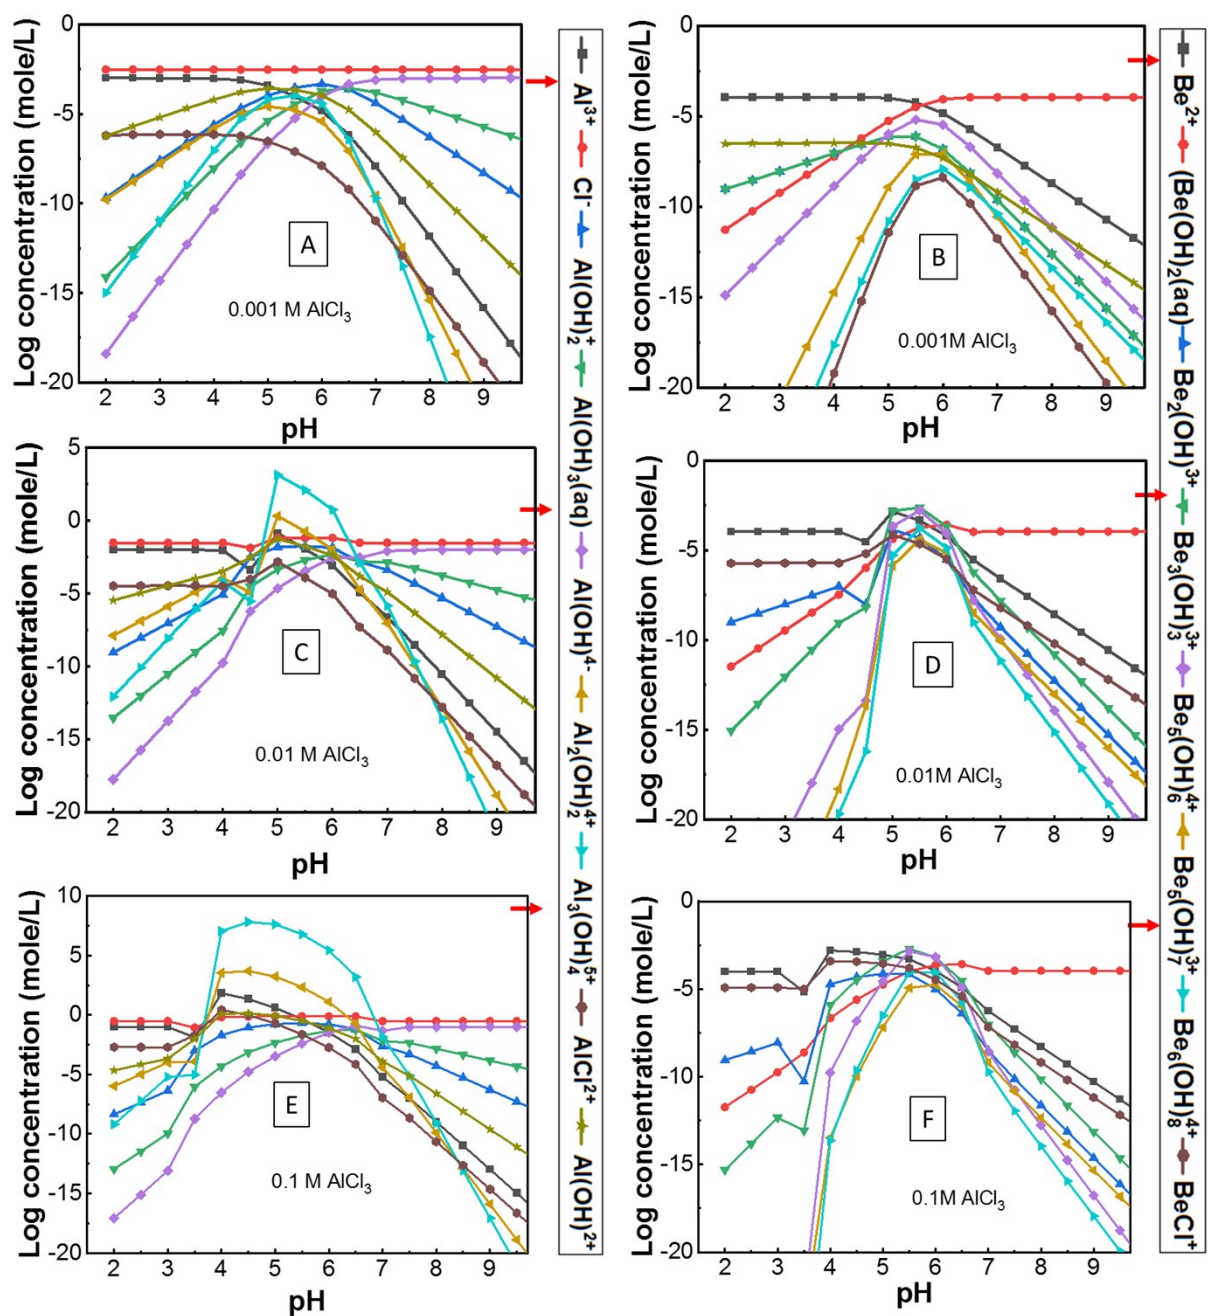

108

109 **Fig. S5** Effect of AlCl<sub>3</sub> concentration (0.001-0.1M) on different species of aluminium and Be  
 110 in solution (data from visual MINTEQ 3.1). (A, B) At 0.001M AlCl<sub>3</sub>, the positive hydrolysis  
 111 products of both Al and Be were increased up to pH 6 and then decreased smoothly; (C, D) A  
 112 decline in the amounts of each species was found at pH 4.5 while considering 0.01M AlCl<sub>3</sub>  
 113 solution; (E, F) Reduction in the species was mainly noticed for 0.1 M AlCl<sub>3</sub> solution at pH  
 114 3.5. From this simulation data, it is noted that the concentration of AlCl<sub>3</sub> shows significant  
 115 effects on the solubility, hydrolysis species and sorption-desorption phenomena of Al and Be.  
 116 However, a higher concentration (e.g. <0.01M AlCl<sub>3</sub>) may not be applicable for visual



117 MINTEQ simulation since it suggests the number of interactions might reach the maximum

118 allowable concentration as specified in the database file.

119

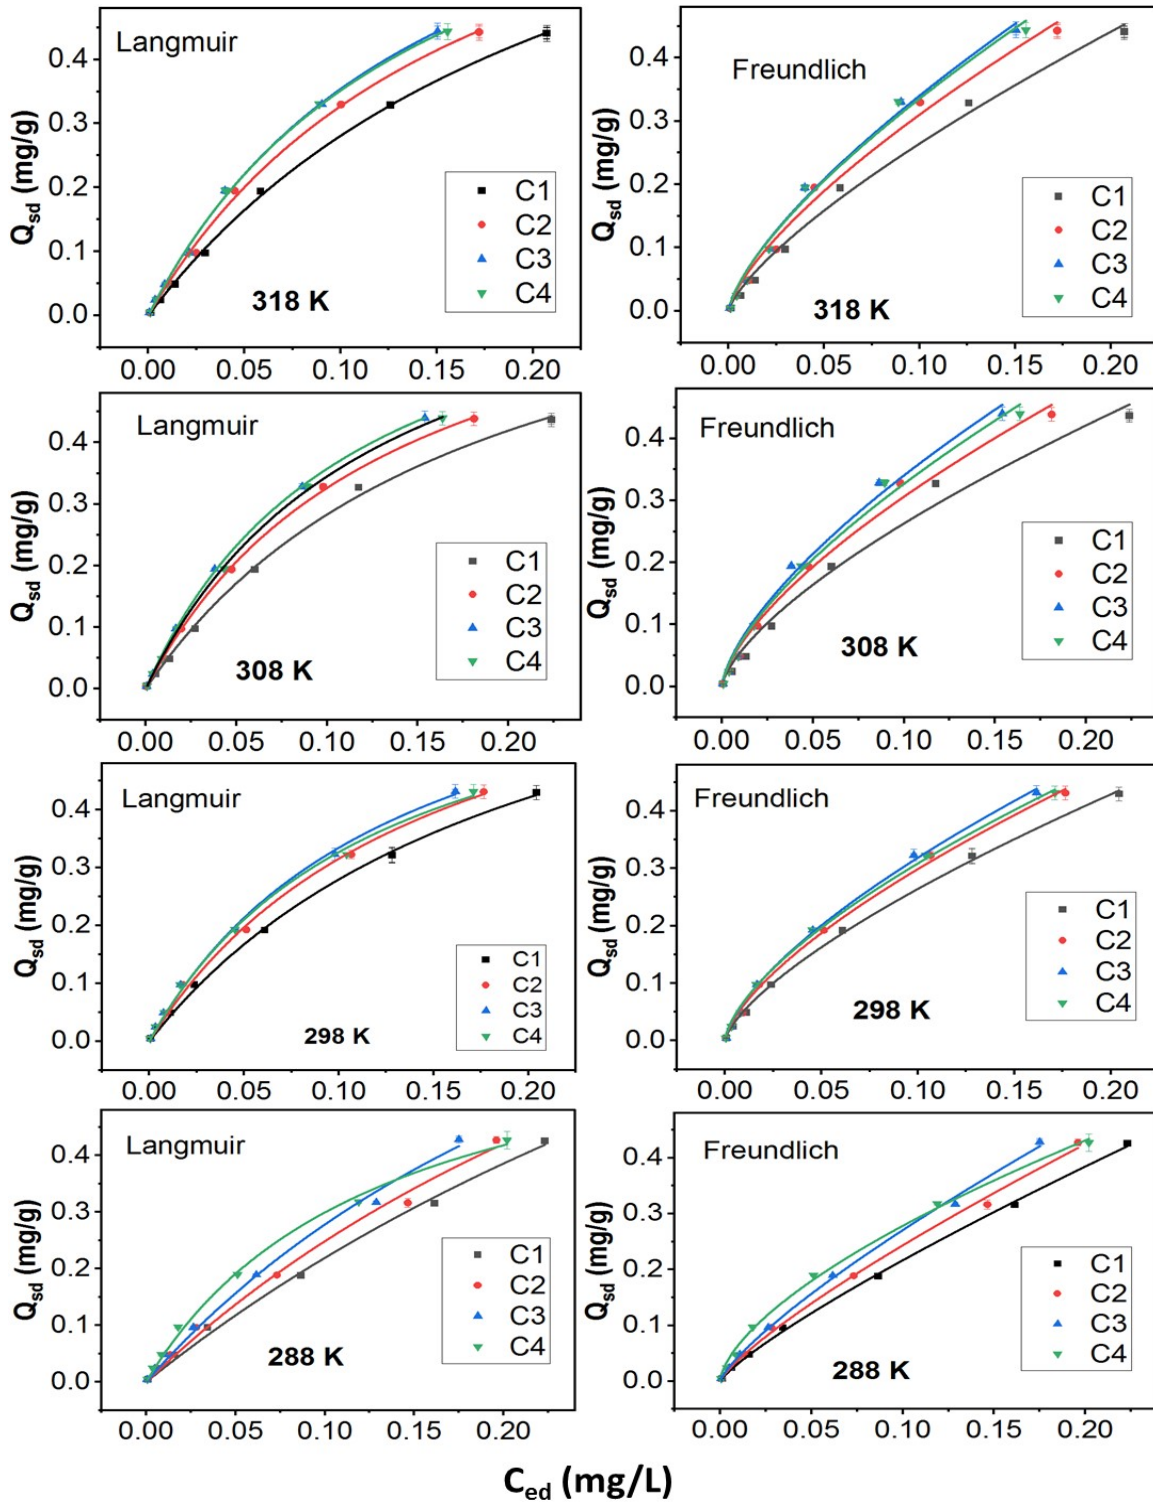

120

121 **Fig. S6** Langmuir and Freundlich desorption isotherm models at different temperatures and  
 122 desorption cycles.  $Q_{sd}$  represents the amount of Be present in the solid surface (still sorbed)  
 123 after each desorption cycle.

124  
 125  
 126

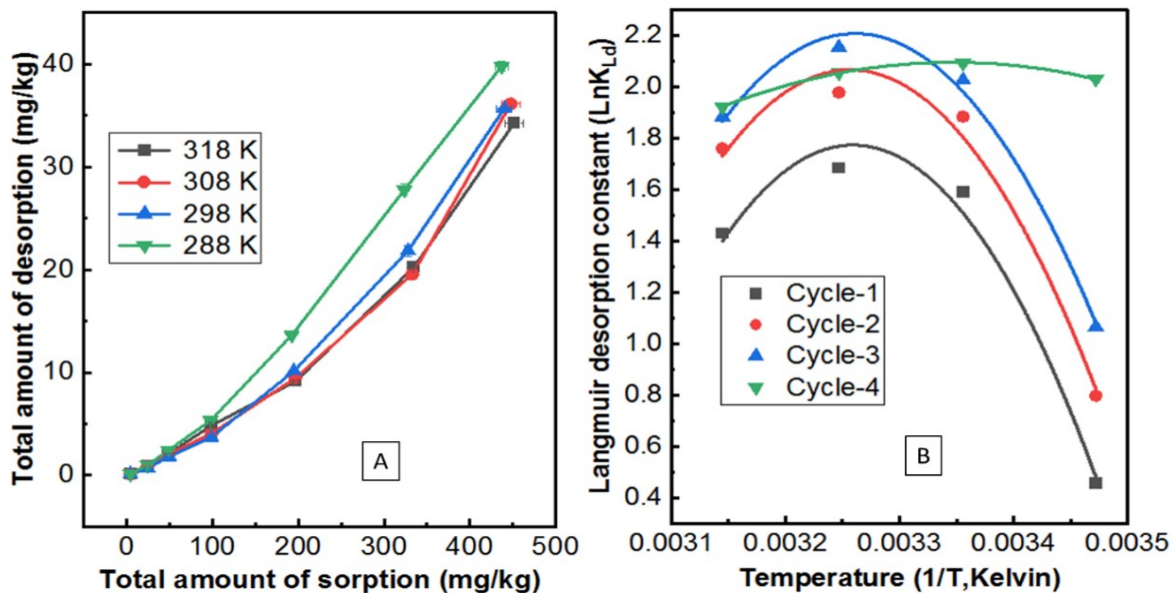

127

128 **Fig. S7** (A) Effect of temperature on total desorption (C1+C2+C3+C4) of Be from the sorbed  
 129 amount; (B) Non-linear dependence of Langmuir desorption constant on temperature.

130

## 131 References

- 132 1. T. E. Payne, Little Forest Legacy Site – Summary of site history until the commencement of  
 133 waste disposal in 1960; Report no. ANSTO / E-782; ANSTO Institute for Environmental  
 134 Research, 2015.
- 135 2. D. Cendón, C. Hughes, J. Harrison, S. Hankin, M. Johansen, T. Payne, H. Wong, B. Rowling,  
 136 M. Vine and K. Wilsher, Identification of sources and processes in a low-level radioactive waste  
 137 site adjacent to landfills: groundwater hydrogeochemistry and isotopes, *Australian Journal of*  
 138 *Earth Sciences*, 2015, **62**, 123-141.
- 139 3. T. Payne, Background report on the Little Forest Burial Ground legacy waste site (ANSTO/E-  
 140 780). Lucas Heights, NSW: Australian Nuclear Science and Technology Organisation, 2012.
- 141 4. T. E. Payne, J. J. Harrison, C. E. Hughes, M. P. Johansen, S. Thiruvoth, K. L. Wilsher, D. I.  
 142 Cendón, S. I. Hankin, B. Rowling and A. Zawadzki, Trench ‘bathtubbing’ and surface  
 143 plutonium contamination at a legacy radioactive waste site, *Environmental science &*  
 144 *technology*, 2013, **47**, 13284-13293.
- 145 5. K. Li, L. Qian, X. Li, Y. Ma and W. Zhou, BeO Utilization in Reactors for the Improvement of  
 146 Extreme Reactor Environments-A Review, *Frontiers in Energy Research*, 2021, 214.
- 147 6. P. Bonhote, *Possible concentration and disposal processes for low level treatment plant sludge*,  
 148 Australian Atomic Energy Commission Research Establishment (AAEC), 1964.

- 149 7. M. R. Islam, P. Sanderson, M. P. Johansen, T. E. Payne and R. Naidu, The influence of soil  
150 properties on sorption-desorption of beryllium at a low level radioactive legacy waste site,  
151 *Chemosphere*, 2021, **268**, 129338.
- 152 8. G. Rayment and F. R. Higginson, *Australian laboratory handbook of soil and water chemical*  
153 *methods*, Inkata Press Pty Ltd, 1992.
- 154 9. U. Ilstedt, A. Nordgren and A. Malmer, Optimum soil water for soil respiration before and after  
155 amendment with glucose in humid tropical acrisols and a boreal mor layer, *Soil Biology and*  
156 *Biochemistry*, 2000, **32**, 1591-1599.
- 157 10. S. Fu, Q. Fang, A. Li, Z. Li, J. Han, X. Dang and W. Han, Accurate characterization of full pore  
158 size distribution of tight sandstones by low-temperature nitrogen gas adsorption and  
159 high-pressure mercury intrusion combination method, *Energy Science & Engineering*, 2021, **9**,  
160 80-100.
- 161 11. L. Qi, X. Tang, Z. Wang and X. Peng, Pore characterization of different types of coal from coal  
162 and gas outburst disaster sites using low temperature nitrogen adsorption approach,  
163 *International Journal of Mining Science and Technology*, 2017, **27**, 371-377.
- 164
